# Supplementary material for: Therapeutic Effects of a Novel Phenylphthalimide Analog for Corneal Neovascularization and Retinal Vascular Leakage
Source: PubMed Central journal article supplement (PMC6054429; doi:10.1167/iovs.18-24015), 2018-07
Supplement: iovs-59-08-18_s01.pdf [file iovs-59-08-18_s01.pdf]

### STZ-induced diabetic BN rats

| GROUPS         | BODY WEIGHT(g) |            | BLOOD GLUCOSE(mg/dL) |            |
|----------------|----------------|------------|----------------------|------------|
|                | DAY 0          | DAY 14     | DAY 2                | DAY 14     |
| COM<br>(n=30)  | 193.3±6.3      | 213.6±10.7 | 502.7±104.1          | 492.9±43.7 |
| THAL<br>(n=24) | 191.2±8.4      | 213.2±10.9 | 525.4±46.7           | 494.4±36.9 |
| DAID<br>(n=24) | 187.6±9.9      | 206.4±9.9  | 521.3±48.5           | 488.9±46.4 |

COM=STZ-induced diabetic BN rats administered by various compounds.  
 THAL=STZ-induced diabetic BN rats administered by various concentration of THAL.  
 DAID=STZ-induced diabetic BN rats administered by various concentration of DAID.
